# Supplementary material for: Is Drought Increasing in Maine and Hurting Wild Blueberry Production?
Source: MDPI journal article supplement (doi:10.3390/cli9120178), 2021-12-08
Supplement: s1 [file s1]

## Supporting Information for “Is drought increasing in Maine and hurting wild blueberry production?”

**Table S1.** Pearson correlation analysis between average Enhanced Vegetation Index (EVI) of growing season (May–September) and different scales of SPEI from May to September at three different wild-blueberry study zones: Airport (Irrigated field, Deblois, ME), Baxter (Non-Irrigated field, Deblois, ME), and WH Counties, Maine.

|         | Airport |        |        |        |           | Baxter |        |        |        |           | Maine  |        |        |        |           |
|---------|---------|--------|--------|--------|-----------|--------|--------|--------|--------|-----------|--------|--------|--------|--------|-----------|
|         | May     | June   | July   | August | September | May    | June   | July   | August | September | May    | June   | July   | August | September |
| SPEI 1  | 0.145   | .448*  | -0.09  | 0.307  | 0.055     | 0.109  | .496*  | -0.129 | 0.352  | 0.070     | 0.131  | 0.303  | -0.123 | 0.296  | 0.197     |
| SPEI 2  | 0.200   | .460*  | 0.320  | 0.160  | 0.300     | 0.213  | .462*  | 0.336  | 0.169  | 0.344     | 0.269  | 0.348  | 0.172  | 0.113  | 0.415     |
| SPEI 3  | 0.094   | .439*  | 0.337  | 0.417  | 0.210     | 0.103  | .469*  | 0.326  | .450*  | 0.231     | 0.192  | 0.405  | 0.223  | 0.276  | 0.258     |
| SPEI 4  | 0.013   | 0.387  | 0.351  | 0.385  | 0.368     | 0.023  | 0.417  | 0.366  | 0.396  | 0.410     | 0.167  | 0.350  | 0.296  | 0.262  | 0.335     |
| SPEI 5  | 0.087   | 0.275  | 0.290  | 0.387  | 0.366     | 0.103  | 0.309  | 0.304  | 0.416  | 0.391     | 0.262  | 0.314  | 0.235  | 0.317  | 0.329     |
| SPEI 6  | 0.239   | 0.270  | 0.201  | 0.333  | 0.385     | 0.272  | 0.311  | 0.219  | 0.360  | 0.428     | 0.398  | 0.362  | 0.218  | 0.272  | 0.386     |
| SPEI 7  | 0.193   | 0.411  | 0.227  | 0.254  | 0.337     | 0.253  | .472*  | 0.255  | 0.286  | 0.381     | 0.363  | .470*  | 0.293  | 0.258  | 0.352     |
| SPEI 8  | 0.316   | 0.344  | 0.365  | 0.290  | 0.270     | 0.340  | 0.427  | 0.408  | 0.327  | 0.314     | 0.421  | .433*  | 0.394  | 0.332  | 0.339     |
| SPEI 9  | 0.319   | .453*  | 0.318  | 0.399  | 0.291     | 0.365  | .497*  | 0.381  | .451*  | 0.344     | 0.381  | .475*  | 0.380  | 0.406  | 0.398     |
| SPEI 10 | .437*   | .446*  | 0.416  | 0.346  | 0.410     | .497*  | .508*  | .453*  | 0.414  | .475*     | .488*  | 0.430  | 0.425  | 0.386  | .473*     |
| SPEI 11 | .520*   | .531*  | 0.389  | 0.419  | 0.360     | .561** | .602** | .440*  | .462*  | .441*     | .540*  | .515*  | 0.372  | 0.411  | .446*     |
| SPEI 12 | .646**  | .589** | .474*  | 0.385  | 0.428     | .656** | .642** | .534*  | .443*  | .481*     | .669** | .549** | .455*  | 0.364  | .460*     |
| SPEI 13 | .647**  | .702** | .530*  | .464*  | 0.401     | .647** | .726** | .576** | .529*  | .469*     | .657** | .667** | .489*  | .437*  | 0.417     |
| SPEI 14 | .583**  | .698** | .645** | .525*  | .472*     | .604** | .713** | .664** | .577** | .547*     | .642** | .654** | .604** | .476*  | .477*     |
| SPEI 15 | .576**  | .634** | .640** | .631** | .528*     | .614** | .667** | .651** | .659** | .590**    | .601** | .637** | .596** | .583** | .512*     |
| SPEI 16 | .563**  | .626** | .587** | .629** | .633**    | .612** | .673** | .615** | .648** | .672**    | .589** | .601** | .588** | .576** | .616**    |
| SPEI 17 | .535*   | .611** | .587** | .585** | .630**    | .601** | .667** | .629** | .619** | .654**    | .577** | .588** | .558** | .573** | .605**    |
| SPEI 18 | .583**  | .586** | .579** | .586** | .580**    | .637** | .657** | .629** | .631** | .617**    | .680** | .578** | .552** | .542*  | .595**    |
| SPEI 19 | .564**  | .624** | .562** | .580** | .581**    | .615** | .684** | .627** | .633** | .631**    | .700** | .664** | .548*  | .540*  | .565**    |
| SPEI 20 | .542*   | .607** | .597** | .570** | .577**    | .594** | .664** | .652** | .638** | .636**    | .730** | .688** | .634** | .544*  | .563**    |
| SPEI 21 | .570**  | .592** | .585** | .604** | .569**    | .611** | .650** | .638** | .663** | .643**    | .732** | .730** | .663** | .629** | .570**    |
| SPEI 22 | .621**  | .616** | .569** | .594** | .605**    | .654** | .665** | .622** | .651** | .670**    | .748** | .731** | .700** | .657** | .650**    |
| SPEI 23 | .619**  | .657** | .592** | .575** | .598**    | .648** | .697** | .637** | .632** | .660**    | .771** | .742** | .704** | .692** | .676**    |
| SPEI 24 | .631**  | .654** | .634** | .604** | .584**    | .658** | .691** | .671** | .653** | .645**    | .779** | .762** | .713** | .702** | .713**    |
| SPEI 25 | .616**  | .667** | .635** | .644** | .613**    | .646** | .702** | .668** | .685** | .665**    | .772** | .774** | .731** | .710** | .720**    |
| SPEI 26 | .624**  | .651** | .648** | .641** | .647**    | .644** | .688** | .681** | .678** | .691**    | .782** | .767** | .747** | .725** | .726**    |
| SPEI 27 | .635**  | .658** | .630** | .650** | .645**    | .657** | .686** | .664** | .686** | .684**    | .799** | .778** | .736** | .738** | .740**    |
| SPEI 28 | .623**  | .670** | .634** | .630** | .656**    | .640** | .698** | .658** | .667** | .695**    | .808** | .795** | .743** | .726** | .753**    |
| SPEI 29 | .578**  | .660** | .646** | .632** | .636**    | .604** | .685** | .670** | .660** | .676**    | .799** | .808** | .762** | .731** | .741**    |
| SPEI 30 | .601**  | .624** | .638** | .645** | .639**    | .620** | .656** | .659** | .673** | .670**    | .815** | .804** | .776** | .750** | .750**    |
| SPEI 31 | .579**  | .643** | .601** | .639** | .653**    | .591** | .669** | .629** | .664** | .684**    | .809** | .819** | .774** | .765** | .769**    |
| SPEI 32 | .545*   | .624** | .621** | .605** | .647**    | .572** | .644** | .644** | .637** | .675**    | .786** | .813** | .789** | .766** | .785**    |
| SPEI 33 | .584**  | .586** | .602** | .623** | .617**    | .604** | .619** | .618** | .650** | .652**    | .807** | .785** | .783** | .781** | .789**    |
| SPEI 34 | .598**  | .621** | .564** | .603** | .631**    | .614** | .647** | .594** | .625** | .661**    | .810** | .804** | .756** | .775** | .801**    |

|         |        |        |        |        |        |        |        |        |        |        |        |        |        |        |        |
|---------|--------|--------|--------|--------|--------|--------|--------|--------|--------|--------|--------|--------|--------|--------|--------|
| SPEI 35 | .589** | .632** | .601** | .567** | .612** | .606** | .655** | .624** | .601** | .636** | .814** | .807** | .775** | .750** | .795** |
| SPEI 36 | .612** | .624** | .611** | .600** | .573** | .644** | .647** | .631** | .629** | .609** | .825** | .811** | .780** | .766** | .764** |
| SPEI 37 | .585** | .641** | .606** | .611** | .604** | .617** | .677** | .626** | .636** | .634** | .802** | .819** | .785** | .773** | .780** |
| SPEI 38 | .574** | .616** | .626** | .608** | .617** | .605** | .653** | .659** | .632** | .643** | .797** | .799** | .795** | .779** | .786** |
| SPEI 39 | .554** | .607** | .602** | .628** | .613** | .579** | .643** | .636** | .665** | .638** | .787** | .794** | .776** | .789** | .792** |
| SPEI 40 | .542*  | .592** | .596** | .607** | .630** | .576** | .623** | .629** | .644** | .668** | .788** | .787** | .774** | .772** | .800** |
| SPEI 41 | .514*  | .581** | .580** | .602** | .609** | .558** | .620** | .608** | .639** | .648** | .785** | .788** | .765** | .771** | .782** |
| SPEI 42 | .521*  | .556** | .571** | .586** | .603** | .572** | .604** | .607** | .618** | .642** | .780** | .784** | .766** | .762** | .781** |
| SPEI 43 | .520*  | .560** | .545*  | .577** | .587** | .572** | .616** | .591** | .617** | .620** | .775** | .780** | .763** | .763** | .772** |
| SPEI 44 | .550** | .557** | .548*  | .554** | .580** | .600** | .613** | .601** | .603** | .620** | .787** | .772** | .759** | .761** | .773** |
| SPEI 45 | .547*  | .580** | .545*  | .558** | .553** | .596** | .634** | .598** | .613** | .603** | .771** | .783** | .753** | .758** | .771** |
| SPEI 46 | .559** | .578** | .567** | .555** | .559** | .612** | .630** | .617** | .611** | .616** | .775** | .768** | .763** | .753** | .769** |
| SPEI 47 | .554** | .586** | .565** | .576** | .555** | .605** | .642** | .613** | .628** | .612** | .770** | .771** | .749** | .764** | .763** |
| SPEI 48 | .555** | .582** | .575** | .575** | .576** | .598** | .637** | .627** | .626** | .630** | .777** | .766** | .753** | .751** | .774** |

The numbers mentioned after “SPEI” indicate different scales of SPEI. (e.g., SPEI\_16 from September represents the drought impact over past 15 months.) The shaded regions of this table indicate the most significant correlations as well as consistent trends repeating every 10-12 months. [Here the numbers indicate Pearson correlation coefficient values.  $p < 0.001^{***}$ ;  $p < 0.01^{**}$ ;  $p < 0.05^{*}$ ].

**Table S2.** Pearson correlation analysis between average yield per year and different scales of SPEI from May to September at three different wild-blueberry study zones: Airport (Irrigated field, Deblois, ME), Baxter (Non-Irrigated field, Deblois, ME), and WH Counties, Maine.

|         | Airport |       |       |        |           | Baxter |      |       |        |           | Maine |       |       |        |           |
|---------|---------|-------|-------|--------|-----------|--------|------|-------|--------|-----------|-------|-------|-------|--------|-----------|
|         | May     | June  | July  | August | September | May    | June | July  | August | September | May   | June  | July  | August | September |
| SPEI_1  | 0.11    | 0.16  | 0.16  | 0.13   | 0.17      | 0.30   | 0.26 | 0.26  | 0.48   | 0.31      | 0.23  | 0.68* | 0.25  | 0.41   | 0.36      |
| SPEI_2  | 0.04    | -0.07 | -0.07 | -0.14  | 0.11      | 0.34   | 0.22 | 0.56* | 0.86*  | 0.55      | 0.08  | 0.68* | 0.65* | 0.61*  | 0.47      |
| SPEI_3  | 0.03    | -0.12 | -0.12 | -0.23  | -0.09     | 0.40   | 0.29 | 0.29  | 0.63*  | 0.45      | 0.18  | 0.52  | 0.68* | 0.62*  | 0.54      |
| SPEI_4  | 0.03    | -0.16 | -0.16 | -0.12  | -0.17     | 0.40   | 0.39 | 0.39  | 0.51   | 0.34      | 0.08  | 0.55  | 0.57  | 0.63*  | 0.65*     |
| SPEI_5  | -0.12   | -0.13 | -0.13 | -0.16  | -0.11     | 0.25   | 0.40 | 0.40  | 0.50   | 0.43      | -0.01 | 0.48  | 0.51  | 0.56   | 0.67*     |
| SPEI_6  | -0.06   | -0.25 | -0.25 | -0.20  | -0.16     | 0.41   | 0.26 | 0.26  | 0.56*  | 0.49      | 0.00  | 0.28  | 0.44  | 0.51   | 0.61      |
| SPEI_7  | -0.14   | -0.19 | -0.19 | -0.19  | -0.22     | 0.39   | 0.40 | 0.40  | 0.57*  | 0.55*     | -0.11 | 0.30  | 0.32  | 0.45   | 0.59      |
| SPEI_8  | -0.05   | -0.24 | -0.24 | -0.25  | -0.19     | 0.53   | 0.38 | 0.38  | 0.51   | 0.57*     | -0.12 | 0.15  | 0.36  | 0.35   | 0.58      |
| SPEI_9  | -0.05   | -0.13 | -0.13 | -0.19  | -0.28     | 0.54   | 0.51 | 0.51  | 0.56*  | 0.50      | -0.09 | 0.13  | 0.23  | 0.39   | 0.48      |
| SPEI_10 | -0.14   | -0.12 | -0.12 | -0.23  | -0.20     | 0.49   | 0.49 | 0.49  | 0.53   | 0.58*     | 0.08  | 0.14  | 0.22  | 0.26   | 0.53      |
| SPEI_11 | -0.15   | -0.20 | -0.20 | -0.16  | -0.24     | 0.38   | 0.44 | 0.44  | 0.62*  | 0.56*     | 0.29  | 0.29  | 0.21  | 0.25   | 0.40      |
| SPEI_12 | -0.10   | -0.20 | -0.20 | -0.15  | -0.16     | 0.43   | 0.35 | 0.35  | 0.58*  | 0.64*     | 0.33  | 0.43  | 0.35  | 0.23   | 0.36      |
| SPEI_13 | -0.17   | -0.16 | -0.16 | -0.21  | -0.15     | 0.34   | 0.39 | 0.39  | 0.53   | 0.60*     | 0.23  | 0.47  | 0.45  | 0.36   | 0.34      |
| SPEI_14 | -0.24   | -0.22 | -0.22 | -0.22  | -0.22     | 0.27   | 0.32 | 0.32  | 0.46   | 0.54      | 0.18  | 0.38  | 0.47  | 0.46   | 0.44      |
| SPEI_15 | -0.15   | -0.28 | -0.28 | -0.19  | -0.24     | 0.29   | 0.25 | 0.25  | 0.48   | 0.46      | 0.20  | 0.34  | 0.40  | 0.48   | 0.53      |
| SPEI_16 | -0.09   | -0.20 | -0.20 | -0.25  | -0.21     | 0.29   | 0.27 | 0.27  | 0.42   | 0.48      | 0.19  | 0.36  | 0.37  | 0.41   | 0.55      |
| SPEI_17 | -0.09   | -0.13 | -0.13 | -0.29  | -0.25     | 0.22   | 0.27 | 0.27  | 0.36   | 0.41      | 0.01  | 0.35  | 0.41  | 0.39   | 0.49      |
| SPEI_18 | -0.16   | -0.13 | -0.13 | -0.22  | -0.29     | 0.22   | 0.20 | 0.20  | 0.38   | 0.35      | 0.18  | 0.18  | 0.41  | 0.42   | 0.47      |
| SPEI_19 | -0.23   | -0.20 | -0.20 | -0.16  | -0.22     | 0.13   | 0.20 | 0.20  | 0.38   | 0.38      | 0.07  | 0.35  | 0.26  | 0.43   | 0.49      |
| SPEI_20 | -0.28   | -0.26 | -0.26 | -0.16  | -0.16     | 0.18   | 0.12 | 0.12  | 0.34   | 0.37      | 0.09  | 0.23  | 0.45  | 0.29   | 0.49      |
| SPEI_21 | -0.35   | -0.31 | -0.31 | -0.21  | -0.16     | 0.13   | 0.17 | 0.17  | 0.33   | 0.32      | 0.24  | 0.26  | 0.34  | 0.47   | 0.38      |
| SPEI_22 | -0.31   | -0.37 | -0.37 | -0.26  | -0.21     | 0.20   | 0.12 | 0.12  | 0.26   | 0.32      | 0.27  | 0.39  | 0.36  | 0.38   | 0.53      |
| SPEI_23 | -0.30   | -0.33 | -0.33 | -0.31  | -0.26     | 0.27   | 0.18 | 0.18  | 0.28   | 0.24      | 0.32  | 0.41  | 0.47  | 0.39   | 0.45      |
| SPEI_24 | -0.18   | -0.33 | -0.33 | -0.36  | -0.31     | 0.38   | 0.25 | 0.25  | 0.24   | 0.27      | 0.40  | 0.45  | 0.47  | 0.49   | 0.46      |
| SPEI_25 | -0.24   | -0.21 | -0.21 | -0.33  | -0.36     | 0.38   | 0.36 | 0.36  | 0.30   | 0.23      | 0.43  | 0.53  | 0.51  | 0.49   | 0.55      |
| SPEI_26 | -0.23   | -0.27 | -0.27 | -0.32  | -0.32     | 0.36   | 0.36 | 0.36  | 0.35   | 0.29      | 0.35  | 0.53  | 0.58  | 0.52   | 0.55      |
| SPEI_27 | -0.28   | -0.25 | -0.25 | -0.21  | -0.32     | 0.33   | 0.34 | 0.34  | 0.44   | 0.34      | 0.38  | 0.47  | 0.57  | 0.60   | 0.59      |
| SPEI_28 | -0.29   | -0.30 | -0.30 | -0.27  | -0.21     | 0.32   | 0.31 | 0.31  | 0.43   | 0.45      | 0.26  | 0.50  | 0.50  | 0.58   | 0.66      |
| SPEI_29 | -0.29   | -0.30 | -0.30 | -0.25  | -0.27     | 0.31   | 0.31 | 0.31  | 0.41   | 0.43      | 0.14  | 0.40  | 0.52  | 0.51   | 0.63      |
| SPEI_30 | -0.23   | -0.31 | -0.31 | -0.30  | -0.25     | 0.36   | 0.29 | 0.29  | 0.38   | 0.41      | 0.12  | 0.30  | 0.43  | 0.54   | 0.58      |
| SPEI_31 | -0.25   | -0.25 | -0.25 | -0.30  | -0.30     | 0.39   | 0.35 | 0.35  | 0.37   | 0.38      | 0.13  | 0.29  | 0.35  | 0.45   | 0.60      |
| SPEI_32 | -0.25   | -0.27 | -0.27 | -0.31  | -0.30     | 0.39   | 0.37 | 0.37  | 0.36   | 0.37      | 0.24  | 0.31  | 0.34  | 0.37   | 0.53      |
| SPEI_33 | -0.21   | -0.26 | -0.26 | -0.25  | -0.31     | 0.45   | 0.37 | 0.37  | 0.41   | 0.36      | 0.24  | 0.41  | 0.35  | 0.36   | 0.46      |
| SPEI_34 | -0.14   | -0.23 | -0.23 | -0.27  | -0.26     | 0.45   | 0.42 | 0.42  | 0.43   | 0.41      | 0.37  | 0.38  | 0.44  | 0.37   | 0.47      |
| SPEI_35 | -0.09   | -0.16 | -0.16 | -0.26  | -0.27     | 0.47   | 0.43 | 0.43  | 0.43   | 0.43      | 0.53  | 0.50  | 0.42  | 0.45   | 0.49      |
| SPEI_36 | -0.09   | -0.11 | -0.11 | -0.23  | -0.26     | 0.45   | 0.44 | 0.44  | 0.48   | 0.42      | 0.61  | 0.66  | 0.52  | 0.43   | 0.54      |
| SPEI_37 | -0.08   | -0.12 | -0.12 | -0.17  | -0.23     | 0.41   | 0.42 | 0.42  | 0.48   | 0.47      | 0.54  | 0.72* | .673* |        | 0.52      |
| SPEI_38 | -0.07   | -0.10 | -0.10 | -0.12  | -0.17     | 0.42   | 0.39 | 0.39  | 0.49   | 0.48      | 0.56  | 0.66  | 0.75* | .682*  | 0.61      |
| SPEI_39 | -0.04   | -0.10 | -0.10 | -0.12  | -0.12     | 0.48   | 0.40 | 0.40  | 0.47   | 0.49      | 0.60  | .682* | .696* | .756*  | .763*     |
| SPEI_40 | -0.03   | -0.07 | -0.07 | -0.11  | -0.12     | 0.54   | 0.46 | 0.46  | 0.45   | 0.47      | 0.58  | .726* | .726* | .709*  | .816*     |
| SPEI_41 | -0.03   | -0.07 | -0.07 | -0.11  | -0.11     | 0.53   | 0.52 | 0.52  | 0.46   | 0.44      | 0.52  | .718* | .747* | .743*  | .781*     |

|         |       |       |       |       |       |      |      |      |       |       |       |        |        |        |        |
|---------|-------|-------|-------|-------|-------|------|------|------|-------|-------|-------|--------|--------|--------|--------|
| SPEI_42 | -0.01 | -0.06 | -0.06 | -0.08 | -0.11 | 0.51 | 0.50 | 0.50 | 0.51  | 0.45  | 0.53  | .674*  | .743*  | .761*  | .815** |
| SPEI_43 | 0.02  | -0.04 | -0.04 | -0.08 | -0.08 | 0.51 | 0.49 | 0.49 | 0.56* | 0.51  | 0.58  | .709*  | .715*  | .759*  | .841** |
| SPEI_44 | -0.01 | -0.01 | -0.01 | -0.07 | -0.08 | 0.45 | 0.49 | 0.49 | 0.55  | 0.56* | 0.59  | .758*  | .739*  | .734*  | .847** |
| SPEI_45 | 0.04  | -0.03 | -0.03 | -0.06 | -0.07 | 0.44 | 0.43 | 0.43 | 0.53  | 0.55* | .680* | .761*  | .785*  | .762*  | .836** |
| SPEI_46 | 0.07  | 0.02  | 0.02  | -0.03 | -0.05 | 0.41 | 0.42 | 0.42 | 0.54  | 0.54  | .750* | .818** | .738*  | .812** | .871** |
| SPEI_47 | 0.10  | 0.04  | 0.04  | -0.05 | -0.03 | 0.44 | 0.39 | 0.39 | 0.48  | 0.54  | .732* | .860** | .813** | .757*  | .907** |
| SPEI_48 | 0.12  | 0.07  | 0.07  | 0.00  | -0.05 | 0.45 | 0.41 | 0.41 | 0.47  | 0.47  | .793* | .850** | .864** | .832** | .850** |

The numbers mentioned after “SPEI” indicate different scales of SPEI. (e.g., SPEI\_16 of September represents the drought severity scale of 16 consecutive months.) The colored regions of this table indicate the most significant correlations. [Here the numbers indicate Pearson correlation coefficient values.  $p < 0.001^{***}$ ;  $p < 0.01^{**}$ ;  $p < 0.05^{*}$ ]
